# Supplementary material for: Cation exchange in a fluorescent zinc-based metal–organic framework for cadmium ion detection
Source: Royal Society of Chemistry journal article supplement (doi:10.1039/d1ce00931a), 2021-01-01
Supplement: d1ce00931a1.pdf [file d1ce00931a1.pdf]

Supplementary Material

# Cation exchanges in a fluorescent zinc-based metal-organic framework for cadmium ion detection

Mao-Long Chen<sup>1</sup>, Zhen-Li Qi<sup>1</sup>, Wan-Ting Jin<sup>2</sup>, Zhou Xu<sup>1</sup>, Yun-Hui Cheng<sup>1,\*</sup>, Zhao-Hui Zhou<sup>2,\*</sup>

<sup>1</sup>College of Chemistry and Food Engineering, Changsha University of Science & Technology, Changsha, 410114, China; <sup>2</sup>State Key Laboratory of Physical Chemistry of Solid Surfaces, College of Chemistry and Chemical Engineering, Xiamen University, Xiamen, 361005, China.

E-mail: cyh@csust.edu.cn and zhzhou@xmu.edu.cn.

|                                                                                                                                                                     |    |
|---------------------------------------------------------------------------------------------------------------------------------------------------------------------|----|
| <b>Experimental details</b> .....                                                                                                                                   | 2  |
| 1. Chemicals and reagents .....                                                                                                                                     | 2  |
| 2. Instrumentation.....                                                                                                                                             | 2  |
| 3. <i>Gas adsorptions of 1</i> .....                                                                                                                                | 2  |
| 4. <i>Measurement of the HDMA</i> .....                                                                                                                             | 2  |
| <b>Table S1.</b> Crystal data and structural refinements for <b>1</b> . .....                                                                                       | 4  |
| <b>Table S2.</b> Selected bond lengths (Å) for <b>1</b> .....                                                                                                       | 5  |
| <b>Table S3.</b> Selected bond angles (°) for <b>1</b> . .....                                                                                                      | 6  |
| <b>Table S4.</b> Gas adsorption data (mg/g) for CH <sub>4</sub> , CO <sub>2</sub> , H <sub>2</sub> , N <sub>2</sub> and O <sub>2</sub> respectively.....            | 7  |
| <b>Scheme 1.</b> Schematic diagram of synthetic process. ....                                                                                                       | 8  |
| <b>Figure S1.</b> Ortep diagram of <b>1</b> at 30% thermal ellipsoids. ....                                                                                         | 8  |
| <b>Figure S2.</b> TGA traces of <b>1</b> ranging from room temperature to 1000 °C.....                                                                              | 9  |
| <b>Figure S3.</b> Solid-state <sup>13</sup> C NMR spectrum of <b>1</b> .....                                                                                        | 10 |
| <b>Figure S4.</b> IR spectra of 1,4-benzenedicarboxylic acid and compound <b>1</b> and nano-sized <b>1a</b> .....                                                   | 11 |
| <b>Figure S5.</b> O <sub>2</sub> adsorption isotherms of <b>1</b> at 298 K.....                                                                                     | 12 |
| <b>Figure S6.</b> N <sub>2</sub> adsorption isotherms of <b>1</b> at 298 K.....                                                                                     | 13 |
| <b>Figure S7.</b> CH <sub>4</sub> adsorption isotherms of <b>1</b> at 298 K.....                                                                                    | 14 |
| <b>Figure S8.</b> CO <sub>2</sub> adsorption isotherms of <b>1</b> at 298 K.....                                                                                    | 15 |
| <b>Figure S9.</b> H <sub>2</sub> adsorption isotherms of <b>1</b> at 298 K.....                                                                                     | 16 |
| <b>Figure S10.</b> Excitation (black line) and emission (red line) spectra of nano-sized <b>1</b> . ....                                                            | 17 |
| <b>Figure S11.</b> Fluorescence intensities for different concentrations of <b>1</b> in aqueous solution (λ <sub>ex</sub> = 310 nm).....                            | 18 |
| <b>Figure S12.</b> Enhancements in fluorescence emission of sensor <b>1</b> in aqueous solution upon continuous additions of 20 ~ 1000 μM of Cd <sup>2+</sup> ..... | 19 |

## Supplementary Material

### Experimental details

#### 1. Chemicals and reagents

All reagents and solvents were of AR grade and used without further purification unless otherwise noted. 2,6-pyridinedicarboxylic acid (99%) was purchased from J&K Scientific Ltd. 1,4-benzenedicarboxylic acid, N,N-Dimethylformamide (DMF), hydrogen peroxide (30%), acetone,  $\text{Zn}(\text{NO}_3)_2 \cdot 6\text{H}_2\text{O}$  and other metal salt reagents were purchased from Sinopharm Chemical Reagent Co., Ltd. All metal ions standard solutions are prepared by 5% nitric acid. Peach Blossom Rice was purchased from Jinjian Rice Industry (Changsha, China).

#### 2. Instrumentation

IR spectra were recorded as KBr disks and mulls in Nujol with a Nicolet 330 FT-IR spectrophotometer. Thermogravimetric analysis was performed with an SDT-Q600 thermal analyzer under an air flow of  $100 \text{ mL} \cdot \text{min}^{-1}$  at a heating rate of  $10 \text{ }^\circ\text{C} \cdot \text{min}^{-1}$ . Powder X-ray diffraction (XRD) data were collected using monochromated  $\text{Cu K}\alpha$  radiation on a Phillips X'Pert diffractometer. Phase purity of nano-sized **1** was established by X-ray powder diffraction on a Philips X'Pert diffractometer. The X-ray pattern shows that the positions of the most intense lines remain unchanged relative to the simulated pattern based on the structural data of the complex **1**. Solid-state  $^{13}\text{C}$  NMR spectrum was recorded with a Bruker AV 400 NMR spectrometer using cross-polarization, magic angle spinning (13 kHz), and adamantane as the reference. The fluorescence spectra were recorded with an F-7000 FL spectrophotometer. Gas adsorption capacities of **1** were evaluated with a magnetic suspension gravimetric sorption analyzer ISOSORP-HTGRA at 298 K under different pressures of  $\text{O}_2$ ,  $\text{CH}_4$ ,  $\text{CO}_2$ ,  $\text{N}_2$ , and  $\text{H}_2$  respectively. The size and zeta-potentials of the nanomaterial were measured using a Brookhaven NanoBrook 90plus Zeta. The calcination was performed at  $5 \text{ }^\circ\text{C} \cdot \text{min}^{-1}$  in GSL-1600X-S60 high temperature tube furnace.

#### 3. Gas adsorptions of **1**

Large quantities of activated **1** have been prepared under heating at  $150 \text{ }^\circ\text{C}$  for one hour and loaded into a magnetic suspension gravimetric sorption analyzer. The gas adsorption data were measured with the change in weight under different pressures of  $\text{O}_2$  ( $\text{CO}_2/\text{CH}_4/\text{N}_2/\text{H}_2$ ) inlet conditions at 298 K respectively.

#### 4. Measurement of the HDMA

The HDMA concentration (with one nitrogen) in the solution was determined with a Folinphenol protein quantitative assay. The HDMA solution was diluted to  $0.2\text{--}0.4 \text{ mg/mL}$  with  $0.05 \text{ mol/L}$  ( $\text{pH} = 8$ )  $\text{Na}_2\text{HPO}_4\text{--NaH}_2\text{PO}_4$  buffer, then  $0.5 \text{ mL}$  of the diluted sample was drawn into a  $10.0 \text{ mL}$  glass test tube,  $2.5 \text{ mL}$  of the alkaline copper reagent was then added, and the mixture was shaken and mixed. After incubation for 10 min,

### **Supplementary Material**

0.25 mL of Folin-B reagent was added; and the mixture was shaken immediately. The mixture was left to stand at room temperature for 30 min, and the absorbance was measured at 500 nm. The glycine for the standard curve of 0–0.5 mg/mL was linearly fitted, and the nitrogen content of the solution was calculated.

**Supplementary Material**

**Table S1.** Crystal data and structural refinements for **1**.

| Empirical formula                                   | $C_{16}H_{21}N_2O_6Zn$                                           |
|-----------------------------------------------------|------------------------------------------------------------------|
| Formula weight                                      | 402.72                                                           |
| Temperature/K                                       | 193.0                                                            |
| Crystal system                                      | Orthorhombic                                                     |
| Space group                                         | <i>P nma</i>                                                     |
| <i>a</i> /Å                                         | 18.3597(8)                                                       |
| <i>b</i> /Å                                         | 30.884(1)                                                        |
| <i>c</i> /Å                                         | 11.3262(4)                                                       |
| Volume/Å <sup>3</sup>                               | 6422.2(4)                                                        |
| <i>Z</i>                                            | 8                                                                |
| $\rho_{cal}$ /mg/mm <sup>3</sup>                    | 0.833                                                            |
| m/mm <sup>-1</sup>                                  | 1.235                                                            |
| <i>F</i> (000)                                      | 1672.0                                                           |
| Crystal size/mm <sup>3</sup>                        | 0.2 × 0.15 × 0.1                                                 |
| $2\theta$ range for data collection                 | 5.724 to 121.396°                                                |
| Index ranges                                        | -18 ≤ <i>h</i> ≤ 20, -17 ≤ <i>k</i> ≤ 34, -12 ≤ <i>l</i> ≤ 12    |
| Reflections collected                               | 11235                                                            |
| Independent reflections                             | 4910 [ <i>R</i> (int) = 0.0452]                                  |
| Data/restraints/parameters                          | 4910/0/230                                                       |
| Goodness-of-fit on <i>F</i> <sup>2</sup>            | 1.079                                                            |
| Final <i>R</i> indexes [ <i>I</i> ≥ 2σ( <i>I</i> )] | <i>R</i> <sub>1</sub> = 0.0700, w <i>R</i> <sub>2</sub> = 0.1844 |
| Final <i>R</i> indexes [all data]                   | <i>R</i> <sub>1</sub> = 0.0772, w <i>R</i> <sub>2</sub> = 0.1901 |
| Largest diff. peak/hole / e Å <sup>-3</sup>         | 0.77/-0.38                                                       |

Supplementary Material

**Table S2.** Selected bond lengths (Å) for **1**.

| Atom-1 | Atom-2          | Length/Å | Atom-1 | Atom-2           | Length/Å |
|--------|-----------------|----------|--------|------------------|----------|
| Zn1    | O2              | 1.965(3) | C6     | C8               | 1.377(6) |
| Zn1    | O1              | 1.958(3) | C6     | C7               | 1.368(7) |
| Zn1    | N1              | 2.063(4) | C6     | C5               | 1.524(6) |
| Zn1    | O3              | 1.985(3) | C8     | C7 <sup>2</sup>  | 1.391(6) |
| O4     | C1              | 1.248(5) | C1     | C2               | 1.480(6) |
| O5     | C5              | 1.247(5) | O6     | C9               | 1.235(6) |
| O2     | C5              | 1.263(6) | C10    | C11              | 1.374(7) |
| O1     | C1              | 1.281(5) | C10    | C9               | 1.488(7) |
| N1     | C14             | 1.499(6) | C10    | C12              | 1.382(8) |
| N1     | C13             | 1.468(7) | C4     | C2               | 1.392(6) |
| C3     | C4 <sup>1</sup> | 1.404(6) | O3     | C9               | 1.269(6) |
| C3     | C2              | 1.403(6) | C11    | C11 <sup>3</sup> | 1.40(1)  |
| N2     | C15             | 1.465(7) | C12    | C12 <sup>3</sup> | 1.37(1)  |
| N2     | C16             | 1.477(8) |        |                  |          |

<sup>1</sup>-x, 1-y, -z; <sup>2</sup>1-x, 1-y, -z; <sup>3</sup>+x, 1/2-y, +z

Supplementary Material

Table S3. Selected bond angles (°) for **1**.

| Atom-1 | Atom-2 | Atom-3          | Angle/°  | Atom | Atom | Atom             | Angle/°  |
|--------|--------|-----------------|----------|------|------|------------------|----------|
| O2     | Zn1    | N1              | 109.2(1) | O1   | C1   | C2               | 116.4(4) |
| O2     | Zn1    | O3              | 108.3(1) | C6   | C7   | C8 <sup>2</sup>  | 120.4(4) |
| O1     | Zn1    | O2              | 125.0(1) | C11  | C10  | C9               | 120.1(5) |
| O1     | Zn1    | N1              | 103.0(1) | C11  | C10  | C12              | 118.2(5) |
| O1     | Zn1    | O3              | 111.1(1) | C12  | C10  | C9               | 121.6(5) |
| O3     | Zn1    | N1              | 96.3(2)  | C2   | C4   | C3 <sup>1</sup>  | 120.7(4) |
| C5     | O2     | Zn1             | 109.9(3) | C9   | O3   | Zn1              | 110.5(3) |
| C1     | O1     | Zn1             | 118.8(3) | C10  | C11  | C11 <sup>3</sup> | 120.6(3) |
| C14    | N1     | Zn1             | 110.7(3) | O5   | C5   | O2               | 124.9(4) |
| C13    | N1     | Zn1             | 111.8(3) | O5   | C5   | C6               | 118.8(4) |
| C13    | N1     | C14             | 109.8(4) | O2   | C5   | C6               | 116.3(4) |
| C2     | C3     | C4 <sup>1</sup> | 120.8(4) | O6   | C9   | C10              | 120.0(5) |
| C15    | N2     | C16             | 112.0(4) | O6   | C9   | O3               | 123.4(5) |
| C8     | C6     | C5              | 120.4(4) | O3   | C9   | C10              | 116.6(5) |
| C7     | C6     | C8              | 119.8(4) | C3   | C2   | C1               | 121.0(4) |
| C7     | C6     | C5              | 119.7(4) | C4   | C2   | C3               | 118.5(4) |
| C6     | C8     | C7 <sup>2</sup> | 119.8(4) | C4   | C2   | C1               | 120.5(4) |
| O4     | C1     | O1              | 124.5(4) | C123 | C12  | C10              | 121.2(3) |
| O4     | C1     | C2              | 119.0(4) |      |      |                  |          |

### Supplementary Material

**Table S4.** Gas adsorption data (mg/g) for CH<sub>4</sub>, CO<sub>2</sub>, H<sub>2</sub>, N<sub>2</sub> and O<sub>2</sub> respectively.

| Pressure (bar) | CH <sub>4</sub> | CO <sub>2</sub> | H <sub>2</sub> | N <sub>2</sub> | O <sub>2</sub> |
|----------------|-----------------|-----------------|----------------|----------------|----------------|
| 0.00           | 0.00            | 0.00            | 0.00           | 0.00           | 0.00           |
| 1.91           | 3.15            | 22.43           | 0.14           | 1.38           | 7.80           |
| 3.91           | 4.75            | 30.19           | 0.18           | 2.37           | 14.85          |
| 5.89           | 6.00            | 35.13           | 0.16           | 3.25           | 22.47          |
| 7.90           | 6.99            | 38.42           | 0.24           | 3.90           | 29.59          |
| 9.90           | 7.72            | 40.94           | 0.31           | 4.72           | 35.11          |
| 11.90          | 8.32            | 43.31           | 0.26           | 5.42           | 43.10          |
| 13.90          | 8.63            | 45.13           | 0.34           | 5.87           | 48.77          |
| 15.90          | 8.93            | 47.09           | 0.35           | 6.38           | 55.82          |
| 17.90          | 9.20            | 48.11           | 0.24           | 6.74           | 62.87          |
| 19.90          | 9.37            | 49.63           | 0.31           | 7.20           | 69.97          |
| 21.90          | 9.74            | 50.50           | 0.29           | 7.32           | 76.03          |
| 23.90          | 9.92            | 51.86           | 0.23           | 7.76           | 82.47          |
| 25.90          | 10.07           | 52.91           | 0.44           | 8.15           | 89.21          |
| 27.90          | 9.92            | 53.70           | 0.29           | 8.53           | 95.63          |
| 29.90          | 10.36           | 54.53           | 0.37           | 8.78           | 103.07         |

## Supplementary Material

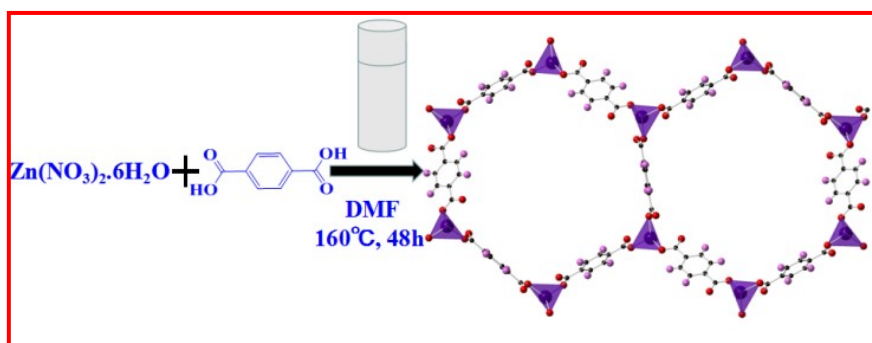

**Scheme 1.** Schematic diagram of synthetic process.

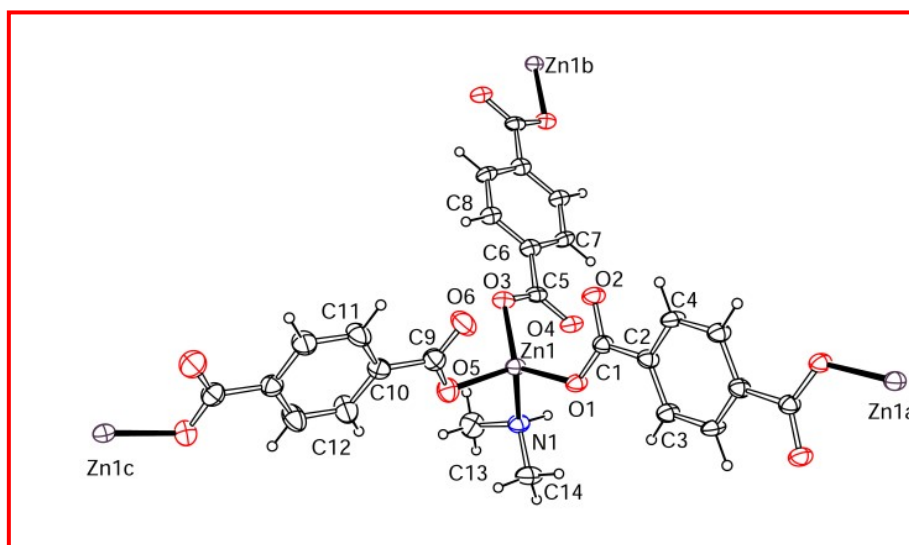

**Figure S1.** Ortep diagram of 1 at 30% thermal ellipsoids.



Supplementary Material

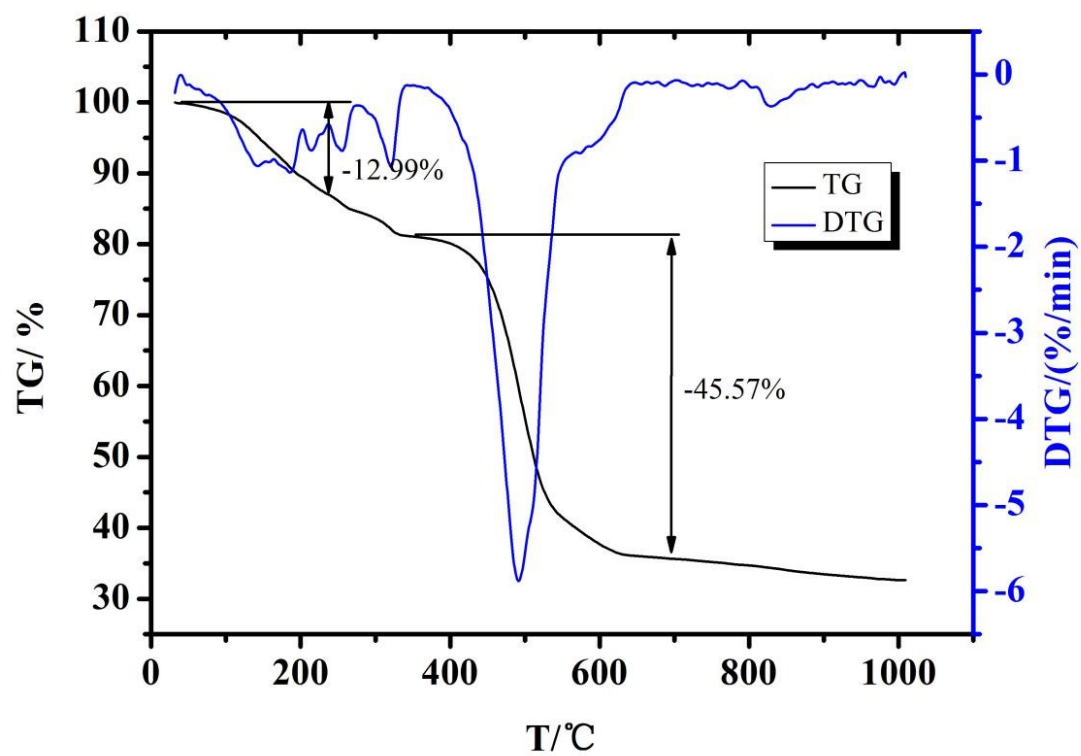

Figure S2. TGA traces of **1** ranging from room temperature to 1000 °C.

Supplementary Material

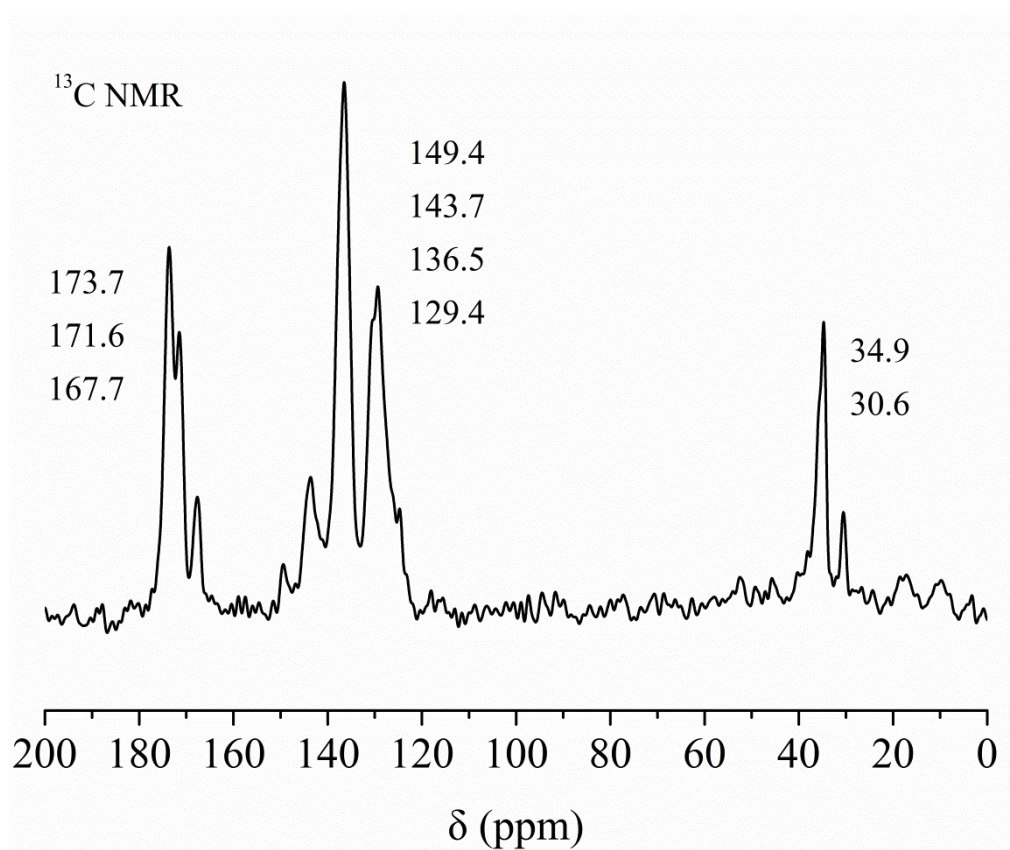

Figure S3. Solid-state  $^{13}\text{C}$  NMR spectrum of **1**.

## Supplementary Material

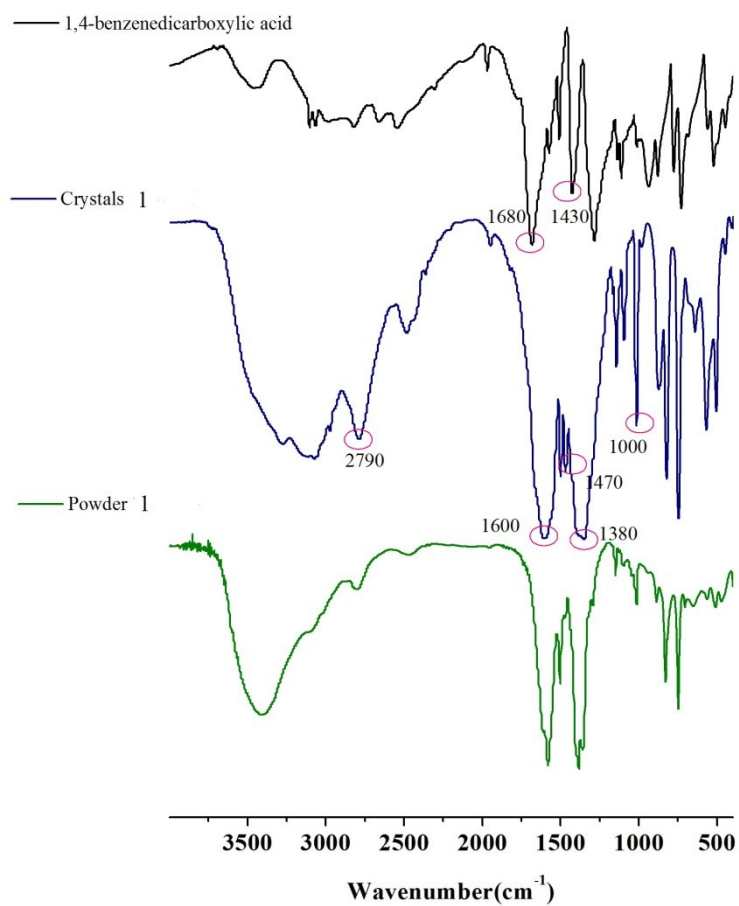

**Figure S4.** IR spectra of 1,4-benzenedicarboxylic acid and compound **1** and nano-sized **1a**.

Supplementary Material

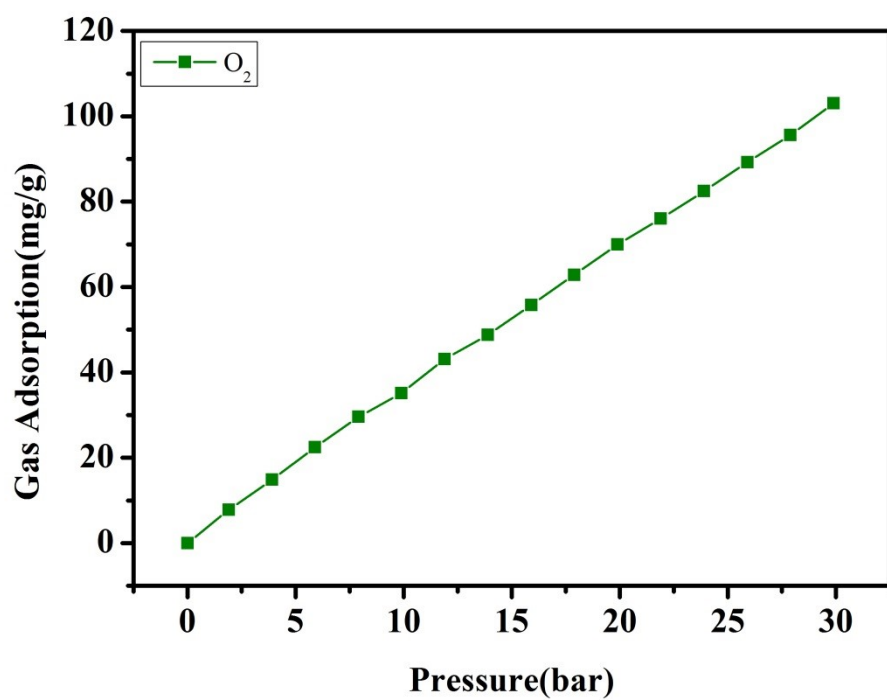

Figure S5. O<sub>2</sub> adsorption isotherms of 1 at 298 K.

Supplementary Material

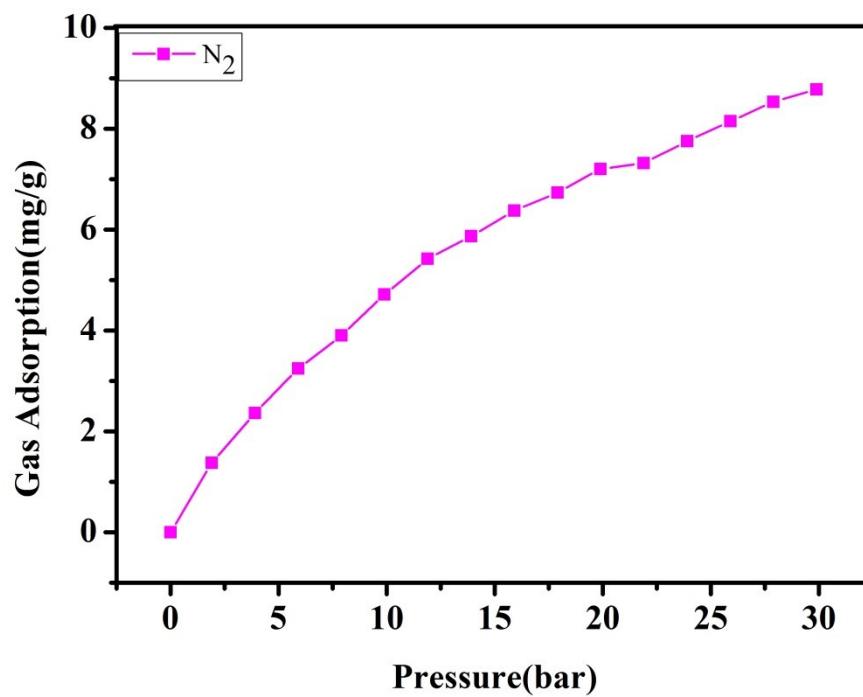

Figure S6. N<sub>2</sub> adsorption isotherms of 1 at 298 K.

Supplementary Material

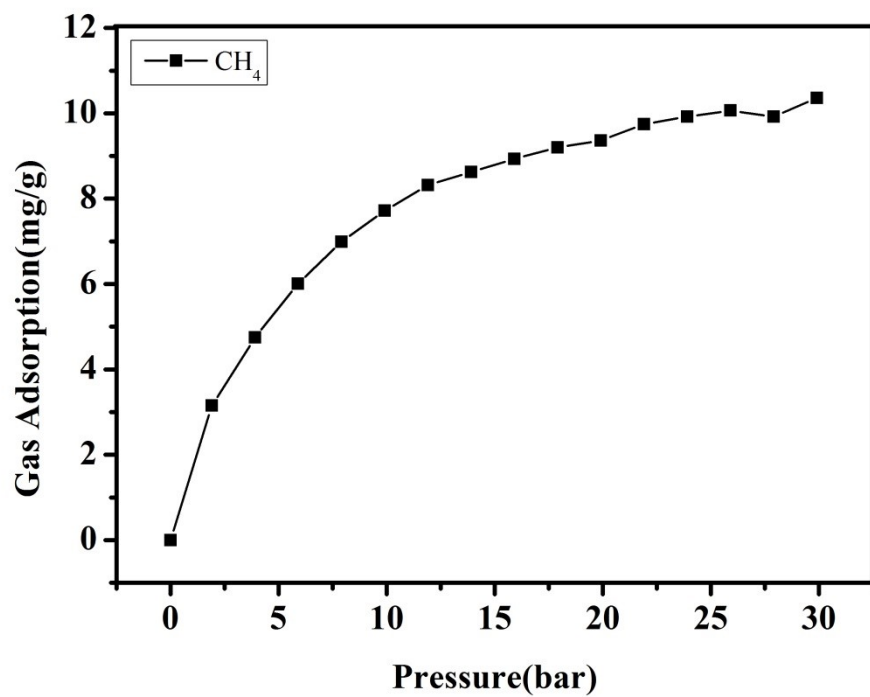

Figure S7. CH<sub>4</sub> adsorption isotherms of 1 at 298 K.

Supplementary Material

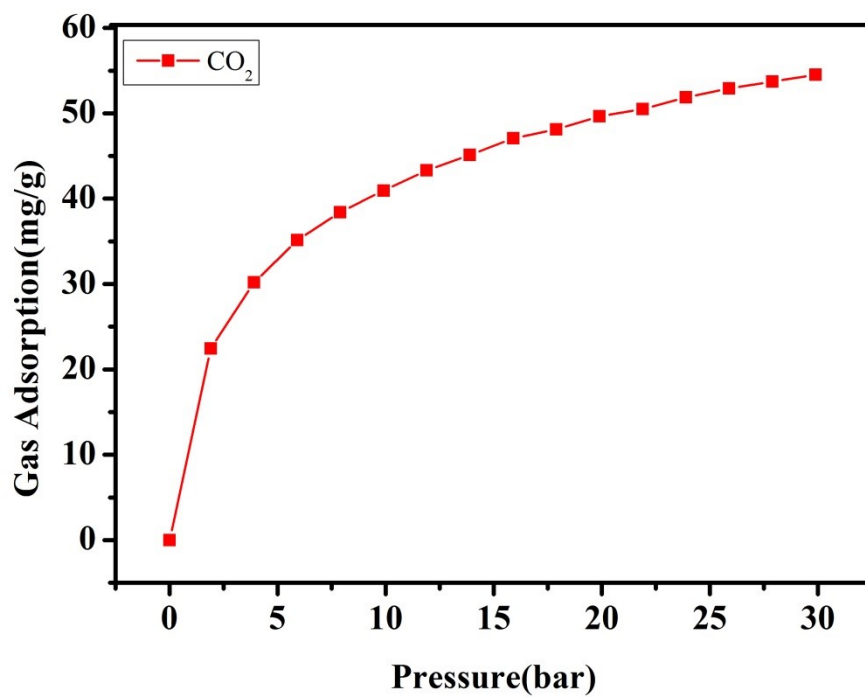

Figure S8. CO<sub>2</sub> adsorption isotherms of 1 at 298 K.

Supplementary Material

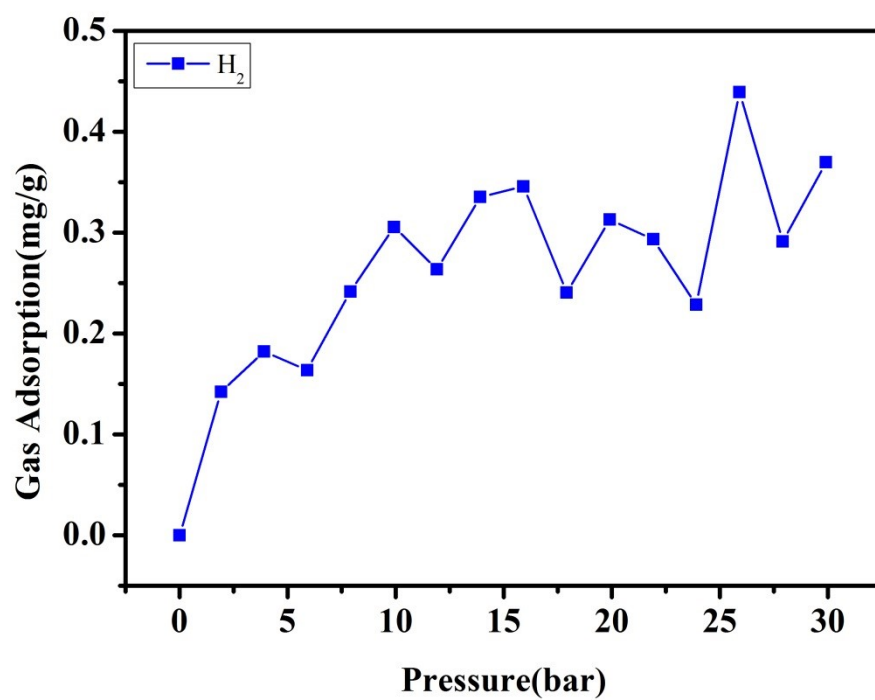

Figure S9. H<sub>2</sub> adsorption isotherms of **1** at 298 K.



Supplementary Material

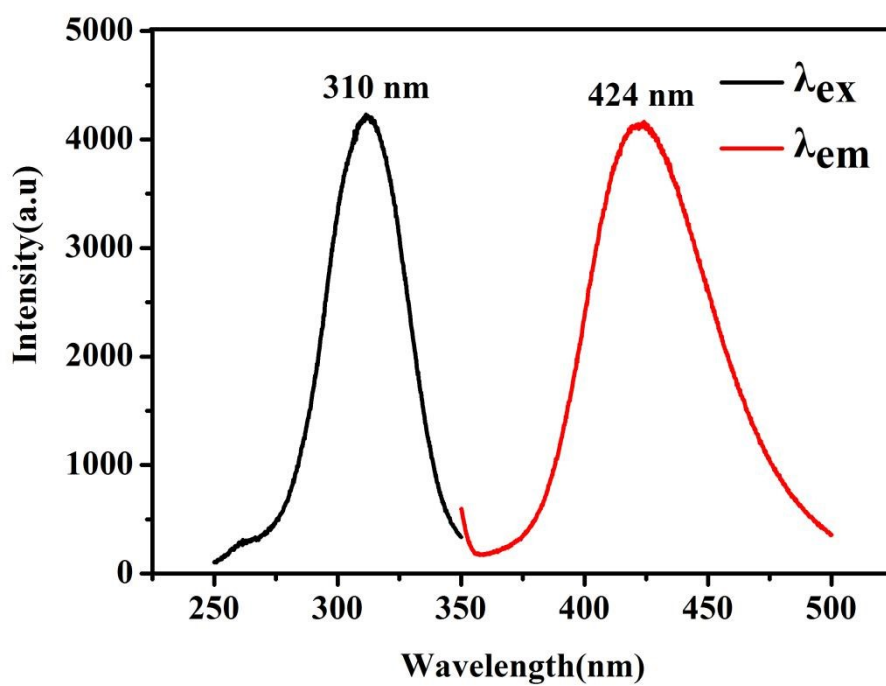

**Figure S10.** Excitation (black line) and emission (red line) spectra of nano-sized **1**.

Supplementary Material

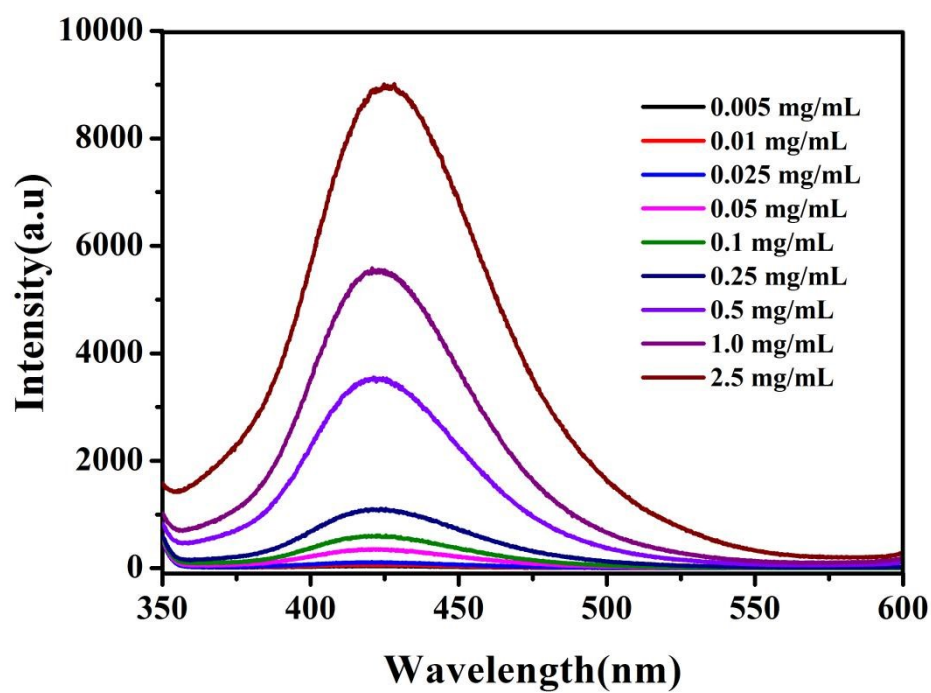

**Figure S11.** Fluorescence intensities for different concentrations of **1** in aqueous solution ( $\lambda_{\text{ex}} = 310 \text{ nm}$ ).

Supplementary Material

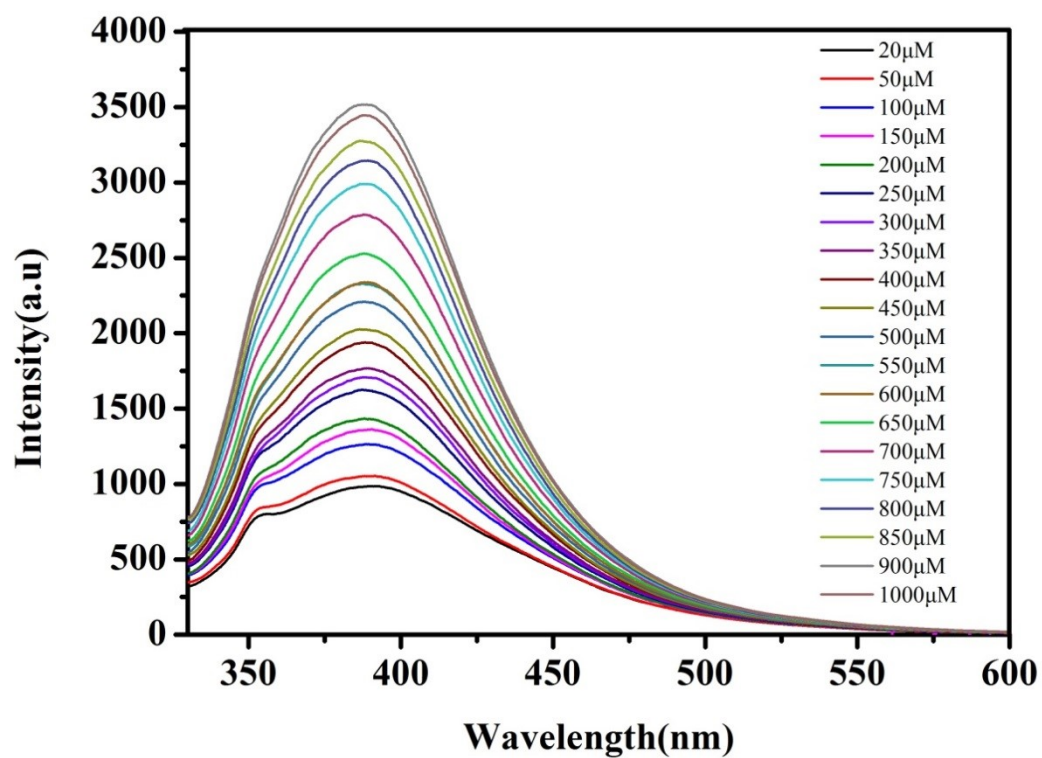

Figure S12. Enhancements in fluorescence emission of sensor 1 in aqueous solution upon continuous additions of 20 ~ 1000 μM of Cd<sup>2+</sup>.
